# Supplementary material for: In silico Mechano-Chemical Model of Bone Healing for the Regeneration of Critical Defects: The Effect of BMP-2
Source: PubMed Central journal article supplement (PMC4456173; doi:10.1371/journal.pone.0127722), 2015-06-04
Supplement: pone.0127722.s002.pdf [file pone.0127722.s002.pdf]

## Support Information 2

In Fig. S2, we can observe the evolution of bone tissue inside the defect during the simulation.

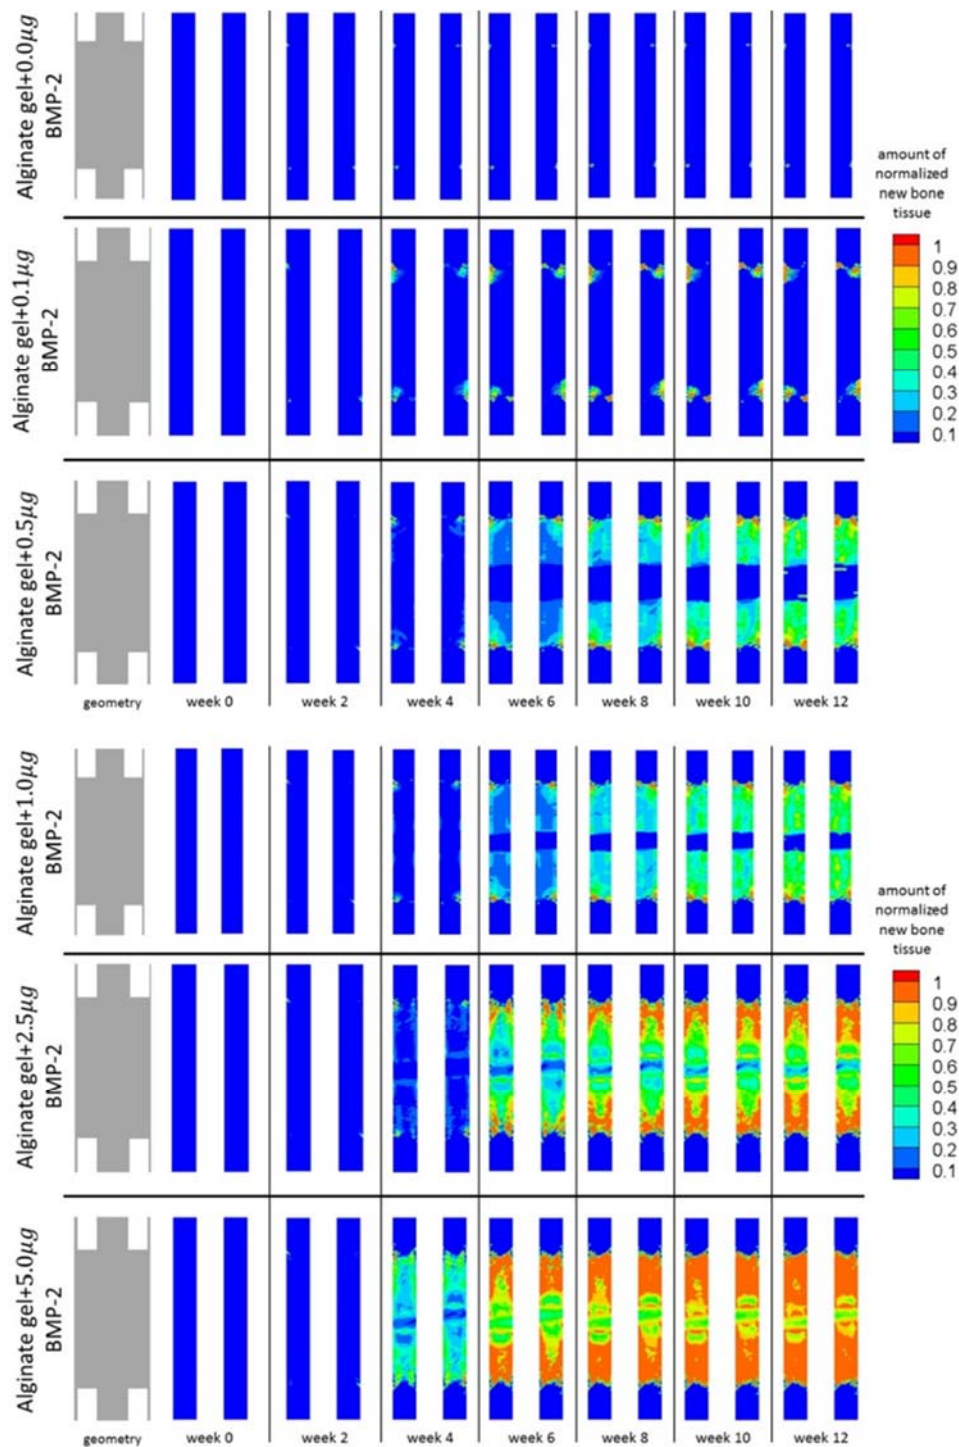

Fig. S2 – **Bone distribution for several BMP-2 doses.** Normalized bone tissue distribution for the BMP-2 doses tested ( $0\mu\text{g}$ ,  $0.1\mu\text{g}$ ,  $0.5\mu\text{g}$ ,  $1\mu\text{g}$ ,  $2.5\mu\text{g}$ ,  $5\mu\text{g}$ ) during the simulated period of 12 weeks
